# Supplementary material
Source: publisher figshare collection journal article supplement (https://wiley.figshare.com/ndownloader/files/9103267)
Supplement: Supplementary file 1 [file 9103267]

## Sheet: Supplemental Table 1
Supplemental Table 1. Plasma metabolome before (PRE) and after (POST) a 4-d, 51-km cross-country ski march.
Super Pathway	Sub Pathway	Biochemical Name	HMDB ID	POST/PRE1	P-value2	Q-value3
Amino Acid	Alanine and Aspartate Metabolism	alanine	HMDB00161	0.62	2.2729e-05	8.01496e-05
Amino Acid	Alanine and Aspartate Metabolism	asparagine	HMDB00168	0.99	0.7621	0.820383
Amino Acid	Alanine and Aspartate Metabolism	aspartate	HMDB00191	0.82	0.0191	0.0328895
Amino Acid	Alanine and Aspartate Metabolism	N-acetylalanine	HMDB00766	1.1	0.0008	0.00186582
Amino Acid	Alanine and Aspartate Metabolism	N-acetylaspartate (NAA)	HMDB00812	0.92	0.0096	0.0178217
Amino Acid	Creatine Metabolism	creatine	HMDB00064	0.67	7.6271e-05	0.000234216
Amino Acid	Creatine Metabolism	creatinine	HMDB00562	1.01	0.2708	0.341162
Amino Acid	Creatine Metabolism	guanidinoacetate	HMDB00128	0.79	4.1963e-06	1.70866e-05
Amino Acid	Glutamate Metabolism	4-hydroxyglutamate	HMDB01344	0.68	0.0001	0.000284556
Amino Acid	Glutamate Metabolism	beta-citrylglutamate		1.4	0.0057	0.0113846
Amino Acid	Glutamate Metabolism	carboxyethyl-GABA	HMDB02201	1.25	0.0007	0.00165353
Amino Acid	Glutamate Metabolism	glutamate	HMDB00148	0.71	0.0009	0.00207281
Amino Acid	Glutamate Metabolism	glutamine	HMDB00641	0.99	0.4841	0.563096
Amino Acid	Glutamate Metabolism	N-acetyl-aspartyl-glutamate (NAAG)	HMDB01067	1.03	0.4785	0.557998
Amino Acid	Glutamate Metabolism	N-acetylglutamate	HMDB01138	0.97	0.6202	0.687349
Amino Acid	Glutamate Metabolism	N-acetylglutamine	HMDB06029	0.89	0.2727	0.342385
Amino Acid	Glutamate Metabolism	pyroglutamine*		0.92	0.1428	0.198199
Amino Acid	Glutamate Metabolism	S-1-pyrroline-5-carboxylate	HMDB01301	0.94	0.1944	0.255388
Amino Acid	Glutathione Metabolism	5-oxoproline	HMDB00267	1.01	0.7775	0.832874
Amino Acid	Glutathione Metabolism	cys-gly, oxidized		0.83	0.0005	0.00121617
Amino Acid	Glutathione Metabolism	cysteine-glutathione disulfide	HMDB00656	0.79	0.2157	0.278408
Amino Acid	Glutathione Metabolism	cysteinylglycine	HMDB00078	0.81	0.017	0.029831
Amino Acid	Glycine, Serine and Threonine Metabolism	2-methylserine		0.72	0.0002	0.000534058
Amino Acid	Glycine, Serine and Threonine Metabolism	betaine	HMDB00043	0.96	0.4174	0.496167
Amino Acid	Glycine, Serine and Threonine Metabolism	dimethylglycine	HMDB00092	1.17	0.0208	0.0354032
Amino Acid	Glycine, Serine and Threonine Metabolism	glycine	HMDB00123	0.97	0.4121	0.490659
Amino Acid	Glycine, Serine and Threonine Metabolism	N-acetylglycine	HMDB00532	1.88	3.4872e-07	1.81717e-06
Amino Acid	Glycine, Serine and Threonine Metabolism	N-acetylserine	HMDB02931	1.06	0.0199	0.0341872
Amino Acid	Glycine, Serine and Threonine Metabolism	N-acetylthreonine		0.88	0.0027	0.00575116
Amino Acid	Glycine, Serine and Threonine Metabolism	sarcosine	HMDB00271	0.96	0.4539	0.532682
Amino Acid	Glycine, Serine and Threonine Metabolism	serine	HMDB00187	0.97	0.8342	0.873303
Amino Acid	Glycine, Serine and Threonine Metabolism	threonine	HMDB00167	0.81	0.0007	0.00165353
Amino Acid	Guanidino and Acetamido Metabolism	4-guanidinobutanoate	HMDB03464	0.75	1.2703e-05	4.65777e-05
Amino Acid	Guanidino and Acetamido Metabolism	guanidinosuccinate	HMDB03157	1.71	6.3037e-06	2.43237e-05
Amino Acid	Histidine Metabolism	1-methylhistidine	HMDB00001	1.11	0.0418	0.065967
Amino Acid	Histidine Metabolism	1-methylimidazoleacetate	HMDB02820	1.12	0.0392	0.0625333
Amino Acid	Histidine Metabolism	3-methylhistidine	HMDB00479	0.34	3.5012e-07	1.81717e-06
Amino Acid	Histidine Metabolism	histidine	HMDB00177	0.91	0.0002	0.000534058
Amino Acid	Histidine Metabolism	hydantoin-5-propionic acid	HMDB01212	1.66	3.6508e-07	1.88157e-06
Amino Acid	Histidine Metabolism	imidazole lactate	HMDB02320	0.95	0.3476	0.42555
Amino Acid	Histidine Metabolism	imidazole propionate	HMDB02271	1.3	0.0244	0.0405932
Amino Acid	Histidine Metabolism	N-acetyl-1-methylhistidine*		0.67	5.1655e-05	0.000166243
Amino Acid	Histidine Metabolism	N-acetyl-3-methylhistidine*		0.32	1.0626e-08	1.01706e-07
Amino Acid	Histidine Metabolism	N-acetylhistidine	HMDB32055	0.91	0.0821	0.120294
Amino Acid	Histidine Metabolism	trans-urocanate	HMDB00301	0.81	0.2023	0.265215
Amino Acid	Leucine, Isoleucine and Valine Metabolism	2-hydroxy-3-methylvalerate	HMDB00317	1.46	9.8763e-06	3.69484e-05
Amino Acid	Leucine, Isoleucine and Valine Metabolism	2-methylbutyrylcarnitine (C5)	HMDB00378	1.45	3.9459e-05	0.000129827
Amino Acid	Leucine, Isoleucine and Valine Metabolism	2-methylbutyrylglycine	HMDB00339	1.24	0.5817	0.654524
Amino Acid	Leucine, Isoleucine and Valine Metabolism	3-hydroxy-2-ethylpropionate	HMDB00396	2.63	6.4587e-10	1.05779e-08
Amino Acid	Leucine, Isoleucine and Valine Metabolism	3-hydroxyisobutyrate	HMDB00336	1.88	0.0202	0.0346219
Amino Acid	Leucine, Isoleucine and Valine Metabolism	3-methyl-2-oxobutyrate	HMDB00019	1.06	0.3228	0.400511
Amino Acid	Leucine, Isoleucine and Valine Metabolism	3-methyl-2-oxovalerate	HMDB03736	1.3	5.2907e-06	2.1077e-05
Amino Acid	Leucine, Isoleucine and Valine Metabolism	3-methylglutaconate	HMDB00522	1.49	2.3646e-06	1.01475e-05
Amino Acid	Leucine, Isoleucine and Valine Metabolism	4-methyl-2-oxopentanoate	HMDB00695	1.18	0.0007	0.00165353
Amino Acid	Leucine, Isoleucine and Valine Metabolism	alpha-hydroxyisocaproate	HMDB00746	1.43	6.0343e-06	2.35306e-05
Amino Acid	Leucine, Isoleucine and Valine Metabolism	alpha-hydroxyisovalerate	HMDB00407	1.24	0.0004	0.000995946
Amino Acid	Leucine, Isoleucine and Valine Metabolism	beta-hydroxyisovalerate	HMDB00754	0.94	0.2569	0.325318
Amino Acid	Leucine, Isoleucine and Valine Metabolism	ethylmalonate	HMDB00622	2.07	3.5848e-11	1.21528e-09
Amino Acid	Leucine, Isoleucine and Valine Metabolism	isobutyrylcarnitine (C4)	HMDB00736	0.95	0.8803	0.912491
Amino Acid	Leucine, Isoleucine and Valine Metabolism	isobutyrylglycine	HMDB00730	0.86	0.0468	0.0721582
Amino Acid	Leucine, Isoleucine and Valine Metabolism	isoleucine	HMDB00172	1.12	0.0191	0.0328895
Amino Acid	Leucine, Isoleucine and Valine Metabolism	isovalerate	HMDB00718	1.1	0.1754	0.234184
Amino Acid	Leucine, Isoleucine and Valine Metabolism	isovalerylcarnitine (C5)	HMDB00688	0.91	0.2026	0.265215
Amino Acid	Leucine, Isoleucine and Valine Metabolism	isovalerylglycine	HMDB00678	0.92	0.3609	0.438916
Amino Acid	Leucine, Isoleucine and Valine Metabolism	leucine	HMDB00687	1.06	0.1767	0.235493
Amino Acid	Leucine, Isoleucine and Valine Metabolism	methylsuccinate	HMDB01844	1.63	6.5295e-08	4.37476e-07
Amino Acid	Leucine, Isoleucine and Valine Metabolism	N-acetylisoleucine		1.06	0.5181	0.594766
Amino Acid	Leucine, Isoleucine and Valine Metabolism	N-acetylleucine	HMDB11756	0.99	0.9455	0.97052
Amino Acid	Leucine, Isoleucine and Valine Metabolism	N-acetylvaline	HMDB11757	1.04	0.4644	0.542413
Amino Acid	Leucine, Isoleucine and Valine Metabolism	tiglylcarnitine (C5:1-DC)	HMDB02366	1.87	6.1173e-09	6.63007e-08
Amino Acid	Leucine, Isoleucine and Valine Metabolism	valine	HMDB00883	0.95	0.1612	0.219196
Amino Acid	Lysine Metabolism	2-aminoadipate	HMDB00510	1.01	0.3637	0.441593
Amino Acid	Lysine Metabolism	3-methylglutarylcarnitine (2)	HMDB00552	0.79	0.0037	0.00763838
Amino Acid	Lysine Metabolism	5-(galactosylhydroxy)-L-lysine		1.19	0.1273	0.178365
Amino Acid	Lysine Metabolism	5-hydroxylysine	HMDB00450	0.98	0.5211	0.595427
Amino Acid	Lysine Metabolism	6-oxopiperidine-2-carboxylate		1	0.4571	0.535585
Amino Acid	Lysine Metabolism	glutarate (pentanedioate)	HMDB00661	1.01	0.3578	0.435865
Amino Acid	Lysine Metabolism	glutarylcarnitine (C5-DC)	HMDB13130	0.91	0.0061	0.0119885
Amino Acid	Lysine Metabolism	lysine	HMDB00182	0.86	8.5502e-05	0.000260392
Amino Acid	Lysine Metabolism	N6,N6,N6-trimethyllysine	HMDB01325	0.84	0.0088	0.0166297
Amino Acid	Lysine Metabolism	N6-acetyllysine	HMDB00206	0.94	0.2734	0.34268
Amino Acid	Lysine Metabolism	N-acetyl-cadaverine		1.22	0.8061	0.852361
Amino Acid	Lysine Metabolism	pipecolate	HMDB00070	0.81	0.0003	0.000765052
Amino Acid	Methionine, Cysteine, SAM and Taurine Metabolism	2-aminobutyrate	HMDB00650	1.46	4.14e-07	2.08985e-06
Amino Acid	Methionine, Cysteine, SAM and Taurine Metabolism	2-hydroxybutyrate/2-hydroxyisobutyrate		3.23	6.769e-12	4.98875e-10
Amino Acid	Methionine, Cysteine, SAM and Taurine Metabolism	alpha-ketobutyrate	HMDB00005	3.14	2.0086e-08	1.70154e-07
Amino Acid	Methionine, Cysteine, SAM and Taurine Metabolism	cystathionine	HMDB00099	0.74	0.1222	0.172202
Amino Acid	Methionine, Cysteine, SAM and Taurine Metabolism	cysteine	HMDB00574	0.93	0.0627	0.0939226
Amino Acid	Methionine, Cysteine, SAM and Taurine Metabolism	cysteine s-sulfate	HMDB00731	0.87	0.0079	0.0150447
Amino Acid	Methionine, Cysteine, SAM and Taurine Metabolism	cysteine sulfinic acid	HMDB00996	0.92	0.7171	0.780654
Amino Acid	Methionine, Cysteine, SAM and Taurine Metabolism	cystine	HMDB00192	1.02	0.6798	0.745554
Amino Acid	Methionine, Cysteine, SAM and Taurine Metabolism	hypotaurine	HMDB00965	1.19	0.3271	0.404484
Amino Acid	Methionine, Cysteine, SAM and Taurine Metabolism	methionine	HMDB00696	0.99	0.8258	0.868209
Amino Acid	Methionine, Cysteine, SAM and Taurine Metabolism	methionine sulfone		1.26	1.7251e-07	9.9328e-07
Amino Acid	Methionine, Cysteine, SAM and Taurine Metabolism	methionine sulfoxide	HMDB02005	0.9	0.007	0.0135407
Amino Acid	Methionine, Cysteine, SAM and Taurine Metabolism	N-acetylmethionine	HMDB11745	1.06	0.1546	0.211392
Amino Acid	Methionine, Cysteine, SAM and Taurine Metabolism	N-acetyltaurine		1.11	0.0557	0.0844669
Amino Acid	Methionine, Cysteine, SAM and Taurine Metabolism	N-formylmethionine	HMDB01015	1.11	0.0071	0.0136624
Amino Acid	Methionine, Cysteine, SAM and Taurine Metabolism	N-methyltaurine		0.36	0.0001	0.000284556
Amino Acid	Methionine, Cysteine, SAM and Taurine Metabolism	S-methylcysteine	HMDB02108	0.82	0.0034	0.00705859
Amino Acid	Methionine, Cysteine, SAM and Taurine Metabolism	S-methylcysteine sulfoxide		0.83	0.382	0.461531
Amino Acid	Methionine, Cysteine, SAM and Taurine Metabolism	S-methylmethionine		0.35	3.4916e-05	0.000116439
Amino Acid	Methionine, Cysteine, SAM and Taurine Metabolism	taurine	HMDB00251	0.98	0.8656	0.901055
Amino Acid	Phenylalanine and Tyrosine Metabolism	2-hydroxyphenylacetate	HMDB00669	1.25	0.0225	0.0381207
Amino Acid	Phenylalanine and Tyrosine Metabolism	3-(3-hydroxyphenyl)propionate	HMDB00375	0.76	0.3336	0.409772
Amino Acid	Phenylalanine and Tyrosine Metabolism	3-(3-hydroxyphenyl)propionate sulfate		0.76	0.4215	0.500234
Amino Acid	Phenylalanine and Tyrosine Metabolism	3-(4-hydroxyphenyl)lactate	HMDB00755	1.4	5.966e-06	2.3388e-05
Amino Acid	Phenylalanine and Tyrosine Metabolism	3-methoxytyrosine	HMDB01434	1.17	0.0002	0.000534058
Amino Acid	Phenylalanine and Tyrosine Metabolism	3-phenylpropionate (hydrocinnamate)	HMDB00764	1.08	0.7625	0.820383
Amino Acid	Phenylalanine and Tyrosine Metabolism	4-hydroxyphenylacetate	HMDB00020	0.94	0.7732	0.830683
Amino Acid	Phenylalanine and Tyrosine Metabolism	4-hydroxyphenylpyruvate	HMDB00707	1.13	0.3292	0.406399
Amino Acid	Phenylalanine and Tyrosine Metabolism	5-bromotryptophan		0.74	6.7766e-05	0.000211625
Amino Acid	Phenylalanine and Tyrosine Metabolism	dopamine 3-O-sulfate	HMDB06275	0.89	0.2784	0.348354
Amino Acid	Phenylalanine and Tyrosine Metabolism	gentisate	HMDB00152	0.42	6.6255e-06	2.54323e-05
Amino Acid	Phenylalanine and Tyrosine Metabolism	homovanillate (HVA)	HMDB00118	1.08	0.3389	0.41559
Amino Acid	Phenylalanine and Tyrosine Metabolism	N-acetylphenylalanine	HMDB00512	0.87	0.0222	0.0376991
Amino Acid	Phenylalanine and Tyrosine Metabolism	N-acetyltyrosine	HMDB00866	0.76	0.0052	0.010471
Amino Acid	Phenylalanine and Tyrosine Metabolism	N-formylphenylalanine		0.75	0.056	0.0847474
Amino Acid	Phenylalanine and Tyrosine Metabolism	o-cresol sulfate		2.64	0.6231	0.689527
Amino Acid	Phenylalanine and Tyrosine Metabolism	p-cresol sulfate	HMDB11635	1.48	0.0014	0.00317477
Amino Acid	Phenylalanine and Tyrosine Metabolism	p-cresol-glucuronide*	HMDB11686	1.79	0.0007	0.00165353
Amino Acid	Phenylalanine and Tyrosine Metabolism	phenol sulfate	HMDB60015	1.02	0.434	0.513416
Amino Acid	Phenylalanine and Tyrosine Metabolism	phenylacetate	HMDB00209	1.44	0.007	0.0135407
Amino Acid	Phenylalanine and Tyrosine Metabolism	phenylalanine	HMDB00159	1	0.9657	0.981684
Amino Acid	Phenylalanine and Tyrosine Metabolism	phenyllactate (PLA)	HMDB00779	1.42	5.7466e-07	2.84245e-06
Amino Acid	Phenylalanine and Tyrosine Metabolism	phenylpyruvate	HMDB00205	0.87	0.0028	0.00594697
Amino Acid	Phenylalanine and Tyrosine Metabolism	thyroxine	HMDB01918	0.95	0.1105	0.157521
Amino Acid	Phenylalanine and Tyrosine Metabolism	tyrosine	HMDB00158	0.93	0.0398	0.0633533
Amino Acid	Phenylalanine and Tyrosine Metabolism	vanillactate	HMDB00913	1.42	0.0005	0.00121617
Amino Acid	Phenylalanine and Tyrosine Metabolism	vanillic alcohol sulfate		2.29	0.0154	0.0273489
Amino Acid	Phenylalanine and Tyrosine Metabolism	vanillylmandelate (VMA)	HMDB00291	1.42	1.1e-06	5.06688e-06
Amino Acid	Polyamine Metabolism	4-acetamidobutanoate	HMDB03681	1.18	0.0046	0.00931374
Amino Acid	Polyamine Metabolism	5-methylthioadenosine (MTA)	HMDB01173	1.04	0.5404	0.615572
Amino Acid	Polyamine Metabolism	acisoga		0.95	0.5198	0.595427
Amino Acid	Polyamine Metabolism	N-acetylputrescine	HMDB02064	1.06	0.0943	0.136006
Amino Acid	Polyamine Metabolism	spermidine	HMDB01257	0.64	0.0004	0.000995946
Amino Acid	Tryptophan Metabolism	3-indoxyl sulfate	HMDB00682	0.86	0.125	0.175476
Amino Acid	Tryptophan Metabolism	5-hydroxyindole sulfate		1.17	0.1184	0.167487
Amino Acid	Tryptophan Metabolism	7-hydroxyindole sulfate		1.3	0.0593	0.089192
Amino Acid	Tryptophan Metabolism	C-glycosyltryptophan		1.03	0.2214	0.285265
Amino Acid	Tryptophan Metabolism	indoleacetate	HMDB00197	1.25	0.0017	0.00376246
Amino Acid	Tryptophan Metabolism	indoleacetylglutamine	HMDB13240	0.47	3.4057e-05	0.000114612
Amino Acid	Tryptophan Metabolism	indolebutyrate	HMDB02096	1.97	3.3264e-05	0.000112457
Amino Acid	Tryptophan Metabolism	indolelactate	HMDB00671	1.08	0.3967	0.473087
Amino Acid	Tryptophan Metabolism	indolepropionate	HMDB02302	0.54	5.1385e-06	2.05819e-05
Amino Acid	Tryptophan Metabolism	kynurenate	HMDB00715	1.25	0.0055	0.011045
Amino Acid	Tryptophan Metabolism	kynurenine	HMDB00684	0.88	0.0071	0.0136624
Amino Acid	Tryptophan Metabolism	N-acetylkynurenine (2)		0.79	0.042	0.066141
Amino Acid	Tryptophan Metabolism	N-acetyltryptophan	HMDB13713	0.51	2.8816e-10	6.24629e-09
Amino Acid	Tryptophan Metabolism	N-formylanthranilic acid	HMDB04089	1.18	0.096	0.138187
Amino Acid	Tryptophan Metabolism	picolinate	HMDB02243	1.81	8.4106e-08	5.43738e-07
Amino Acid	Tryptophan Metabolism	serotonin	HMDB00259	1.99	0.1688	0.227018
Amino Acid	Tryptophan Metabolism	thioproline		1.07	0.4912	0.568311
Amino Acid	Tryptophan Metabolism	tryptophan	HMDB00929	0.78	2.5089e-06	1.06882e-05
Amino Acid	Tryptophan Metabolism	tryptophan betaine	HMDB61115	1.36	0.034	0.055561
Amino Acid	Tryptophan Metabolism	xanthurenate	HMDB00881	1.3	0.0443	0.0690256
Amino Acid	Urea cycle; Arginine and Proline Metabolism	2-oxoarginine*	HMDB04225	0.43	8.59e-12	5.27569e-10
Amino Acid	Urea cycle; Arginine and Proline Metabolism	arginine	HMDB00517	0.8	3.184e-06	1.31832e-05
Amino Acid	Urea cycle; Arginine and Proline Metabolism	citrulline	HMDB00904	0.98	0.8082	0.853357
Amino Acid	Urea cycle; Arginine and Proline Metabolism	dimethylarginine (SDMA + ADMA)	HMDB01539	0.99	0.9083	0.938874
Amino Acid	Urea cycle; Arginine and Proline Metabolism	homoarginine	HMDB00670	0.71	2.9667e-08	2.25803e-07
Amino Acid	Urea cycle; Arginine and Proline Metabolism	homocitrulline	HMDB00679	1.11	0.2053	0.267325
Amino Acid	Urea cycle; Arginine and Proline Metabolism	N-acetylarginine	HMDB04620	0.53	4.6945e-10	8.64962e-09
Amino Acid	Urea cycle; Arginine and Proline Metabolism	N-acetylproline		0.86	0.0208	0.0354032
Amino Acid	Urea cycle; Arginine and Proline Metabolism	N-alpha-acetylornithine	HMDB03357	0.76	0.0229	0.0385326
Amino Acid	Urea cycle; Arginine and Proline Metabolism	N-delta-acetylornithine		0.96	0.1722	0.23115
Amino Acid	Urea cycle; Arginine and Proline Metabolism	N-methylproline		0.25	1.0963e-08	1.03586e-07
Amino Acid	Urea cycle; Arginine and Proline Metabolism	N-monomethylarginine	HMDB29416	0.91	0.1877	0.248357
Amino Acid	Urea cycle; Arginine and Proline Metabolism	ornithine	HMDB03374	0.69	1.6926e-09	2.54581e-08
Amino Acid	Urea cycle; Arginine and Proline Metabolism	pro-hydroxy-pro	HMDB06695	0.94	0.111	0.157929
Amino Acid	Urea cycle; Arginine and Proline Metabolism	proline	HMDB00162	0.82	0.0003	0.000765052
Amino Acid	Urea cycle; Arginine and Proline Metabolism	trans-4-hydroxyproline	HMDB00725	0.7	0.0003	0.000765052
Amino Acid	Urea cycle; Arginine and Proline Metabolism	urea	HMDB00294	1.56	1.9789e-07	1.09658e-06
Carbohydrate	Aminosugar Metabolism	erythronate*	HMDB00613	0.97	0.0913	0.132197
Carbohydrate	Aminosugar Metabolism	glucuronate	HMDB00127	1.33	3.023e-09	3.78031e-08
Carbohydrate	Aminosugar Metabolism	N-acetylglucosamine/N-acetylgalactosamine		1.1	0.1629	0.220694
Carbohydrate	Aminosugar Metabolism	N-acetylglucosaminylasparagine	HMDB00489	0.93	0.6581	0.724992
Carbohydrate	Aminosugar Metabolism	N-acetylneuraminate	HMDB00230	1.2	0.0024	0.00515685
Carbohydrate	Disaccharides and Oligosaccharides	sucrose	HMDB00258	1.39	0.1521	0.20836
Carbohydrate	Fructose, Mannose and Galactose Metabolism	fructose	HMDB00660	0.91	0.1506	0.206689
Carbohydrate	Fructose, Mannose and Galactose Metabolism	galactitol (dulcitol)	HMDB00107	0.77	3.2476e-05	0.000110665
Carbohydrate	Fructose, Mannose and Galactose Metabolism	galactonate	HMDB00565	0.69	0.032	0.0525256
Carbohydrate	Fructose, Mannose and Galactose Metabolism	mannitol/sorbitol	HMDB00247	0.49	2.2833e-08	1.89078e-07
Carbohydrate	Fructose, Mannose and Galactose Metabolism	mannose	HMDB00169	1.06	0.0403	0.064011
Carbohydrate	Glycogen Metabolism	maltose	HMDB00163	1.39	0.0756	0.111434
Carbohydrate	Glycolysis, Gluconeogenesis, and Pyruvate Metabolism	1,5-anhydroglucitol (1,5-AG)	HMDB02712	1	0.491	0.568311
Carbohydrate	Glycolysis, Gluconeogenesis, and Pyruvate Metabolism	3-phosphoglycerate	HMDB00807	1.28	0.7819	0.833951
Carbohydrate	Glycolysis, Gluconeogenesis, and Pyruvate Metabolism	glucose	HMDB00122	0.95	0.006	0.0118552
Carbohydrate	Glycolysis, Gluconeogenesis, and Pyruvate Metabolism	glycerate	HMDB00139	0.83	0.0001	0.000284556
Carbohydrate	Glycolysis, Gluconeogenesis, and Pyruvate Metabolism	lactate	HMDB00190	0.68	8.8635e-05	0.000268823
Carbohydrate	Glycolysis, Gluconeogenesis, and Pyruvate Metabolism	pyruvate	HMDB00243	0.83	0.0044	0.00900778
Carbohydrate	Pentose Metabolism	arabinose	HMDB00646	1.02	0.8688	0.903111
Carbohydrate	Pentose Metabolism	arabitol/xylitol		0.81	1.0554e-07	6.42835e-07
Carbohydrate	Pentose Metabolism	arabonate/xylonate		0.74	9.841e-05	0.000284556
Carbohydrate	Pentose Metabolism	ribitol	HMDB00508	0.99	0.3698	0.448261
Carbohydrate	Pentose Metabolism	ribonate	HMDB00867	0.88	0.0095	0.0177253
Carbohydrate	Pentose Metabolism	sedoheptulose	HMDB03219	0.66	0.0008	0.00186582
Carbohydrate	Pentose Metabolism	xylose	HMDB00098	0.92	0.4314	0.51116
Cofactors and Vitamins	Ascorbate and Aldarate Metabolism	gulonate*	HMDB03290	0.87	0.0038	0.00782291
Cofactors and Vitamins	Ascorbate and Aldarate Metabolism	oxalate (ethanedioate)	HMDB02329	0.75	0.0942	0.136006
Cofactors and Vitamins	Ascorbate and Aldarate Metabolism	threonate	HMDB00943	0.93	0.1677	0.22595
Cofactors and Vitamins	Hemoglobin and Porphyrin Metabolism	bilirubin (E,E)*		1.73	1.0047e-07	6.20124e-07
Cofactors and Vitamins	Hemoglobin and Porphyrin Metabolism	bilirubin (E,Z or Z,E)*		1.48	1.7945e-07	1.02523e-06
Cofactors and Vitamins	Hemoglobin and Porphyrin Metabolism	bilirubin (Z,Z)	HMDB00054	1.3	5.8269e-06	2.29648e-05
Cofactors and Vitamins	Hemoglobin and Porphyrin Metabolism	biliverdin	HMDB01008	1.42	0.0001	0.000284556
Cofactors and Vitamins	Hemoglobin and Porphyrin Metabolism	L-urobilin	HMDB04159	15.53	5.4775e-07	2.72765e-06
Cofactors and Vitamins	Nicotinate and Nicotinamide Metabolism	1-methylnicotinamide	HMDB00699	2.13	0.0002	0.000534058
Cofactors and Vitamins	Nicotinate and Nicotinamide Metabolism	N1-Methyl-2-pyridone-5-carboxamide	HMDB04193	1.11	0.1153	0.163416
Cofactors and Vitamins	Nicotinate and Nicotinamide Metabolism	N1-Methyl-4-pyridone-3-carboxamide	HMDB04194	0.93	0.9513	0.974683
Cofactors and Vitamins	Nicotinate and Nicotinamide Metabolism	nicotinamide	HMDB01406	1.37	0.0695	0.103269
Cofactors and Vitamins	Nicotinate and Nicotinamide Metabolism	nicotinamide riboside	HMDB00855	1.17	0.0383	0.0616312
Cofactors and Vitamins	Nicotinate and Nicotinamide Metabolism	quinolinate	HMDB00232	0.9	0.043	0.0675714
Cofactors and Vitamins	Nicotinate and Nicotinamide Metabolism	trigonelline (N'-methylnicotinate)	HMDB00875	0.39	1.6623e-05	6.03505e-05
Cofactors and Vitamins	Pantothenate and CoA Metabolism	pantothenate	HMDB00210	1.35	0.0015	0.00337043
Cofactors and Vitamins	Tocopherol Metabolism	alpha-tocopherol	HMDB01893	0.95	0.2682	0.339045
Cofactors and Vitamins	Tocopherol Metabolism	gamma-CEHC	HMDB01931	1.24	0.0361	0.0586029
Cofactors and Vitamins	Tocopherol Metabolism	gamma-tocopherol/beta-tocopherol		1.07	0.1725	0.23115
Cofactors and Vitamins	Vitamin A Metabolism	retinol (Vitamin A)	HMDB00305	0.84	0.0002	0.000534058
Cofactors and Vitamins	Vitamin B6 Metabolism	pyridoxal	HMDB01545	1.17	0.0091	0.0170654
Cofactors and Vitamins	Vitamin B6 Metabolism	pyridoxate	HMDB00017	0.8	0.1198	0.169143
Energy	Oxidative Phosphorylation	phosphate	HMDB01429	1.13	0.0145	0.0258753
Energy	TCA Cycle	2-methylcitrate/homocitrate		1.94	7.2041e-09	7.27318e-08
Energy	TCA Cycle	aconitate [cis or trans]	HMDB00072	1.68	1.7122e-11	7.88682e-10
Energy	TCA Cycle	alpha-ketoglutarate	HMDB00208	1.14	0.0031	0.00650912
Energy	TCA Cycle	citrate	HMDB00094	1.31	5.8908e-08	4.05749e-07
Energy	TCA Cycle	fumarate	HMDB00134	1.21	0.0026	0.0055542
Energy	TCA Cycle	malate	HMDB00156	1.27	0.0002	0.000534058
Energy	TCA Cycle	succinate	HMDB00254	1.01	0.4844	0.563096
Energy	TCA Cycle	succinylcarnitine (C4-DC)		0.52	1.1142e-06	5.10041e-06
Lipid	Carnitine Metabolism	carnitine	HMDB00062	0.93	0.0064	0.0124783
Lipid	Carnitine Metabolism	deoxycarnitine	HMDB01161	1.08	0.0527	0.0802477
Lipid	Ceramides	ceramide (d16:1/24:1, d18:1/22:1)*		0.68	2.8636e-06	1.20598e-05
Lipid	Ceramides	ceramide (d18:1/14:0, d16:1/16:0)*		0.96	0.6166	0.684389
Lipid	Ceramides	ceramide (d18:1/17:0, d17:1/18:0)*		0.86	0.0904	0.131151
Lipid	Ceramides	ceramide (d18:1/20:0, d16:1/22:0, d20:1/18:0)*		0.7	6.1304e-07	2.95301e-06
Lipid	Ceramides	ceramide (d18:2/24:1, d18:1/24:2)*		0.66	1.3352e-10	3.28014e-09
Lipid	Ceramides	glycosyl ceramide (d18:1/20:0, d16:1/22:0)*		1.09	0.005	0.0100959
Lipid	Ceramides	glycosyl ceramide (d18:1/23:1, d17:1/24:1)*		1	0.8935	0.924873
Lipid	Ceramides	glycosyl ceramide (d18:2/24:1, d18:1/24:2)*		1.14	2.478e-05	8.61456e-05
Lipid	Diacylglycerol	diacylglycerol (16:1/18:2 [2], 16:0/18:3 [1])*		0.19	9.468e-12	5.36763e-10
Lipid	Diacylglycerol	linoleoyl-arachidonoyl-glycerol (18:2/20:4) [1]*		0.74	0.0238	0.039865
Lipid	Diacylglycerol	linoleoyl-arachidonoyl-glycerol (18:2/20:4) [2]*		0.81	0.2218	0.285282
Lipid	Diacylglycerol	linoleoyl-docosahexaenoyl-glycerol (18:2/22:6) [1]*		0.7	0.0336	0.0550293
Lipid	Diacylglycerol	linoleoyl-linolenoyl-glycerol (18:2/18:3) [1]*		0.21	1.2751e-10	3.28014e-09
Lipid	Diacylglycerol	linoleoyl-linoleoyl-glycerol (18:2/18:2) [1]*		0.3	3.8396e-11	1.21528e-09
Lipid	Diacylglycerol	oleoyl-arachidonoyl-glycerol (18:1/20:4) [1]*		0.71	0.0002	0.000534058
Lipid	Diacylglycerol	oleoyl-arachidonoyl-glycerol (18:1/20:4) [2]*		0.76	0.0004	0.000995946
Lipid	Diacylglycerol	oleoyl-linoleoyl-glycerol (18:1/18:2) [1]		0.31	8.485e-12	5.27569e-10
Lipid	Diacylglycerol	oleoyl-linoleoyl-glycerol (18:1/18:2) [2]		0.29	3.362e-12	3.29623e-10
Lipid	Diacylglycerol	oleoyl-oleoyl-glycerol (18:1/18:1) [1]*		0.28	3.2515e-11	1.19818e-09
Lipid	Diacylglycerol	oleoyl-oleoyl-glycerol (18:1/18:1) [2]*		0.25	3.578e-12	3.29623e-10
Lipid	Diacylglycerol	palmitoleoyl-arachidonoyl-glycerol (16:1/20:4) [2]*		0.12	9.3e-14	1.22833e-11
Lipid	Diacylglycerol	palmitoleoyl-linoleoyl-glycerol (16:1/18:2) [1]*		0.19	4.5162e-10	8.53446e-09
Lipid	Diacylglycerol	palmitoyl-arachidonoyl-glycerol (16:0/20:4) [1]*		1.87	1.2192e-06	5.51258e-06
Lipid	Diacylglycerol	palmitoyl-arachidonoyl-glycerol (16:0/20:4) [2]*		0.74	0.0177	0.0309121
Lipid	Diacylglycerol	palmitoyl-docosahexaenoyl-glycerol (16:0/22:6) [1]*		0.84	0.6106	0.680805
Lipid	Diacylglycerol	palmitoyl-linoleoyl-glycerol (16:0/18:2) [1]*		0.18	4.8604e-08	3.47778e-07
Lipid	Diacylglycerol	palmitoyl-linoleoyl-glycerol (16:0/18:2) [2]*		0.31	3.9897e-10	7.73792e-09
Lipid	Diacylglycerol	palmitoyl-oleoyl-glycerol (16:0/18:1) [1]*		0.26	2.9825e-11	1.1569e-09
Lipid	Diacylglycerol	palmitoyl-oleoyl-glycerol (16:0/18:1) [2]*		0.27	4.9672e-09	5.54671e-08
Lipid	Endocannabinoid	linoleoyl ethanolamide	HMDB12252	0.66	0.2721	0.342215
Lipid	Endocannabinoid	N-oleoyltaurine		2	0.0008	0.00186582
Lipid	Endocannabinoid	N-palmitoyltaurine		1.8	0.0005	0.00121617
Lipid	Endocannabinoid	oleoyl ethanolamide	HMDB02088	1.57	0.0003	0.000765052
Lipid	Fatty Acid Metabolism (Acyl Choline)	linoleoylcholine*		0.59	0.0015	0.00337043
Lipid	Fatty Acid Metabolism (Acyl Choline)	oleoylcholine		0.53	0.0002	0.000534058
Lipid	Fatty Acid Metabolism (Acyl Choline)	palmitoylcholine		0.66	0.0029	0.00614167
Lipid	Fatty Acid Metabolism (Acyl Choline)	stearoylcholine*		0.53	0.0513	0.07844
Lipid	Fatty Acid Metabolism (Acyl Glutamine)	hexanoylglutamine		13.8	7.1e-14	1.22833e-11
Lipid	Fatty Acid Metabolism (also BCAA Metabolism)	butyrylcarnitine (C4)	HMDB02013	1.87	2.4714e-05	8.61456e-05
Lipid	Fatty Acid Metabolism (also BCAA Metabolism)	butyrylglycine	HMDB00808	0.98	0.6596	0.72556
Lipid	Fatty Acid Metabolism (also BCAA Metabolism)	methylmalonate (MMA)	HMDB00202	0.82	5.4885e-06	2.17474e-05
Lipid	Fatty Acid Metabolism (also BCAA Metabolism)	propionylcarnitine (C3)	HMDB00824	0.74	0.0004	0.000995946
Lipid	Fatty Acid Metabolism (also BCAA Metabolism)	propionylglycine	HMDB00783	0.71	0.0111	0.02035
Lipid	Fatty Acid Metabolism(Acyl Carnitine)	3-hydroxybutyrylcarnitine (1)	HMDB13127	25.05	9.4e-14	1.22833e-11
Lipid	Fatty Acid Metabolism(Acyl Carnitine)	3-hydroxybutyrylcarnitine (2)		4.01	1.0912e-10	3.09313e-09
Lipid	Fatty Acid Metabolism(Acyl Carnitine)	acetylcarnitine (C2)	HMDB00201	2.43	2.9458e-11	1.1569e-09
Lipid	Fatty Acid Metabolism(Acyl Carnitine)	adipoylcarnitine (C6-DC)		6.32	1e-13	1.22833e-11
Lipid	Fatty Acid Metabolism(Acyl Carnitine)	adrenoylcarnitine (C22:4)*		0.61	6.3302e-05	0.000198526
Lipid	Fatty Acid Metabolism(Acyl Carnitine)	arachidonoylcarnitine (C20:4)		0.75	5.3911e-05	0.00017275
Lipid	Fatty Acid Metabolism(Acyl Carnitine)	arachidoylcarnitine (C20)*	HMDB06460	2.49	5.0878e-09	5.59658e-08
Lipid	Fatty Acid Metabolism(Acyl Carnitine)	behenoylcarnitine (C22)*		1.7	9.9597e-05	0.000284556
Lipid	Fatty Acid Metabolism(Acyl Carnitine)	cerotoylcarnitine (C26)*	HMDB06347	1.12	0.0157	0.0278147
Lipid	Fatty Acid Metabolism(Acyl Carnitine)	cis-4-decenoylcarnitine (C10:1)		2.2	1.3572e-07	8.00205e-07
Lipid	Fatty Acid Metabolism(Acyl Carnitine)	decanoylcarnitine (C10)	HMDB00651	2.56	1.9655e-07	1.09658e-06
Lipid	Fatty Acid Metabolism(Acyl Carnitine)	dihomo-linolenoylcarnitine (20:3n3 or 6)*		0.78	7.4336e-06	2.80952e-05
Lipid	Fatty Acid Metabolism(Acyl Carnitine)	dihomo-linoleoylcarnitine (C20:2)*		1.16	0.0072	0.0138187
Lipid	Fatty Acid Metabolism(Acyl Carnitine)	eicosenoylcarnitine (C20:1)*		1.85	2.6341e-10	5.88282e-09
Lipid	Fatty Acid Metabolism(Acyl Carnitine)	erucoylcarnitine (C22:1)*		3.94	4.0422e-09	4.88377e-08
Lipid	Fatty Acid Metabolism(Acyl Carnitine)	hexanoylcarnitine (C6)	HMDB00705	2.76	3.0198e-09	3.78031e-08
Lipid	Fatty Acid Metabolism(Acyl Carnitine)	laurylcarnitine (C12)	HMDB02250	3.28	6.5224e-09	6.86716e-08
Lipid	Fatty Acid Metabolism(Acyl Carnitine)	lignoceroylcarnitine (C24)*		1.89	1.38e-07	8.0719e-07
Lipid	Fatty Acid Metabolism(Acyl Carnitine)	linolenoylcarnitine (C18:3)*		1.57	4.5396e-06	1.82824e-05
Lipid	Fatty Acid Metabolism(Acyl Carnitine)	linoleoylcarnitine (C18:2)*	HMDB06469	1.24	0.0016	0.00358419
Lipid	Fatty Acid Metabolism(Acyl Carnitine)	margaroylcarnitine*		1.67	4.2328e-07	2.12216e-06
Lipid	Fatty Acid Metabolism(Acyl Carnitine)	myristoleoylcarnitine (C14:1)*		4.4	1.2279e-10	3.28014e-09
Lipid	Fatty Acid Metabolism(Acyl Carnitine)	myristoylcarnitine (C14)	HMDB05066	2.6	9.6338e-09	9.34225e-08
Lipid	Fatty Acid Metabolism(Acyl Carnitine)	nervonoylcarnitine (C24:1)*		1.92	2.0596e-10	4.74352e-09
Lipid	Fatty Acid Metabolism(Acyl Carnitine)	octanoylcarnitine (C8)	HMDB00791	2.46	1.9145e-07	1.08537e-06
Lipid	Fatty Acid Metabolism(Acyl Carnitine)	oleoylcarnitine (C18:1)	HMDB05065	1.77	2.2445e-08	1.87977e-07
Lipid	Fatty Acid Metabolism(Acyl Carnitine)	palmitoleoylcarnitine (C16:1)*		3.06	3.8781e-11	1.21528e-09
Lipid	Fatty Acid Metabolism(Acyl Carnitine)	palmitoylcarnitine (C16)	HMDB00222	1.59	1.4389e-08	1.30922e-07
Lipid	Fatty Acid Metabolism(Acyl Carnitine)	pimeloylcarnitine/3-methyladipoylcarnitine (C7-DC)		1.77	5.8723e-07	2.86344e-06
Lipid	Fatty Acid Metabolism(Acyl Carnitine)	stearoylcarnitine (C18)	HMDB00848	1.38	7.5809e-05	0.000233771
Lipid	Fatty Acid Metabolism(Acyl Carnitine)	suberoylcarnitine (C8-DC)		7.61	3.9575e-11	1.21528e-09
Lipid	Fatty Acid Metabolism(Acyl Carnitine)	ximenoylcarnitine (C26:1)*		1.27	6.9511e-05	0.00021525
Lipid	Fatty Acid Metabolism(Acyl Glycine)	hexanoylglycine	HMDB00701	2.54	3.1248e-10	6.57994e-09
Lipid	Fatty Acid Metabolism(Acyl Glycine)	N-palmitoylglycine		1.38	1.1632e-06	5.29184e-06
Lipid	Fatty Acid Synthesis	2-methylmalonylcarnitine (C4-DC)	HMDB13133	1	0.4904	0.568311
Lipid	Fatty Acid Synthesis	malonate	HMDB00691	1.23	5.8391e-07	2.86344e-06
Lipid	Fatty Acid Synthesis	malonylcarnitine	HMDB02095	1.02	0.7086	0.772542
Lipid	Fatty Acid, Amide	oleamide	HMDB02117	1.53	0.0661	0.0986148
Lipid	Fatty Acid, Amino	2-aminoheptanoate		1.41	0.0046	0.00931374
Lipid	Fatty Acid, Amino	2-aminooctanoate	HMDB00991	1.98	2.3682e-06	1.01475e-05
Lipid	Fatty Acid, Branched	13-methylmyristate		2.22	4.043e-07	2.05496e-06
Lipid	Fatty Acid, Branched	15-methylpalmitate		2.88	4.4595e-09	5.21691e-08
Lipid	Fatty Acid, Branched	17-methylstearate		2.49	6.2634e-08	4.23498e-07
Lipid	Fatty Acid, Branched	isocaproate	HMDB00689	0.65	0.003	0.00631714
Lipid	Fatty Acid, Dicarboxylate	2-hydroxyadipate	HMDB00321	1.34	0.0275	0.0453412
Lipid	Fatty Acid, Dicarboxylate	2-hydroxyglutarate	HMDB00606	1.1	0.0227	0.0383713
Lipid	Fatty Acid, Dicarboxylate	3-carboxy-4-methyl-5-propyl-2-furanpropanoate (CMPF)	HMDB61112	1.15	2.6838e-06	1.13676e-05
Lipid	Fatty Acid, Dicarboxylate	3-methyladipate	HMDB00555	3.59	4.9813e-10	8.741e-09
Lipid	Fatty Acid, Dicarboxylate	4-hydroxy-2-oxoglutaric acid	HMDB02070	0.49	1.0097e-07	6.20124e-07
Lipid	Fatty Acid, Dicarboxylate	adipate	HMDB00448	4.5	9.0722e-08	5.71471e-07
Lipid	Fatty Acid, Dicarboxylate	azelate (nonanedioate)	HMDB00784	1.1	0.0359	0.0584068
Lipid	Fatty Acid, Dicarboxylate	docosadioate		0.89	0.0562	0.0848758
Lipid	Fatty Acid, Dicarboxylate	dodecanedioate	HMDB00623	4.4	2.279e-07	1.24417e-06
Lipid	Fatty Acid, Dicarboxylate	eicosanodioate		0.81	8.9035e-05	0.000268929
Lipid	Fatty Acid, Dicarboxylate	hexadecanedioate	HMDB00672	3.08	2.4404e-09	3.39354e-08
Lipid	Fatty Acid, Dicarboxylate	maleate	HMDB00176	1.3	0.0406	0.0643488
Lipid	Fatty Acid, Dicarboxylate	octadecanedioate	HMDB00782	2.82	6.3772e-10	1.05779e-08
Lipid	Fatty Acid, Dicarboxylate	sebacate (decanedioate)	HMDB00792	6.06	6.9323e-07	3.3176e-06
Lipid	Fatty Acid, Dicarboxylate	tetradecanedioate	HMDB00872	3.59	6.8153e-09	7.07447e-08
Lipid	Fatty Acid, Dihydroxy	12,13-DiHOME	HMDB04705	1.67	3.9997e-05	0.000131012
Lipid	Fatty Acid, Dihydroxy	9,10-DiHOME	HMDB04704	1.62	0.0007	0.00165353
Lipid	Fatty Acid, Monohydroxy	13-HODE + 9-HODE		2.45	2.4534e-07	1.31982e-06
Lipid	Fatty Acid, Monohydroxy	16-hydroxypalmitate	HMDB06294	1.73	6.2005e-05	0.000195289
Lipid	Fatty Acid, Monohydroxy	2-hydroxydecanoate		1.84	1.5463e-08	1.37275e-07
Lipid	Fatty Acid, Monohydroxy	2-hydroxyoctanoate	HMDB02264	1.98	2.1931e-09	3.1083e-08
Lipid	Fatty Acid, Monohydroxy	2-hydroxypalmitate	HMDB31057	1.18	0.0061	0.0119885
Lipid	Fatty Acid, Monohydroxy	2-hydroxystearate		1.16	0.0093	0.0173962
Lipid	Fatty Acid, Monohydroxy	3-hydroxydecanoate	HMDB02203	4.68	6.387e-11	1.88289e-09
Lipid	Fatty Acid, Monohydroxy	3-hydroxyhexanoate		6.25	4.33e-12	3.54579e-10
Lipid	Fatty Acid, Monohydroxy	3-hydroxylaurate	HMDB00387	3.71	2.98e-11	1.1569e-09
Lipid	Fatty Acid, Monohydroxy	3-hydroxyoctanoate	HMDB01954	5.02	1.2988e-10	3.28014e-09
Lipid	Fatty Acid, Monohydroxy	3-hydroxysebacate	HMDB00350	10.04	6.365e-09	6.79856e-08
Lipid	Fatty Acid, Monohydroxy	5-hydroxyhexanoate	HMDB00525	2.68	7.1767e-08	4.72252e-07
Lipid	Fatty Acid, Monohydroxy	9-hydroxystearate		3.09	3.84e-07	1.96533e-06
Lipid	Fatty Acid, Monohydroxy	alpha-hydroxycaproate	HMDB01624	0.93	0.9522	0.974683
Lipid	Glycerolipid Metabolism	glycerol	HMDB00131	1.65	1.9593e-07	1.09658e-06
Lipid	Glycerolipid Metabolism	glycerol 3-phosphate	HMDB00126	0.8	0.0443	0.0690256
Lipid	Glycerolipid Metabolism	glycerophosphoglycerol		0.73	0.145	0.200497
Lipid	Inositol Metabolism	inositol hexakisphosphate	HMDB03502	1	1	1
Lipid	Inositol Metabolism	myo-inositol	HMDB00211	1.29	0.002	0.00434808
Lipid	Ketone Bodies	3-hydroxybutyrate (BHBA)	HMDB00357	31.25	3e-14	1.1055e-11
Lipid	Ketone Bodies	acetoacetate	HMDB00060	20.59	5.3311e-10	9.13726e-09
Lipid	Long Chain Fatty Acid	10-heptadecenoate (17:1n7)	HMDB60038	4.24	1.7905e-09	2.6392e-08
Lipid	Long Chain Fatty Acid	10-nonadecenoate (19:1n9)	HMDB13622	4.34	1.3925e-08	1.28284e-07
Lipid	Long Chain Fatty Acid	arachidate (20:0)	HMDB02212	2.08	1.0653e-07	6.43546e-07
Lipid	Long Chain Fatty Acid	behenate (22:0)*	HMDB00944	1.51	0.0037	0.00763838
Lipid	Long Chain Fatty Acid	eicosenoate (20:1)	HMDB02231	4.71	6.654e-10	1.06609e-08
Lipid	Long Chain Fatty Acid	erucate (22:1n9)	HMDB02068	3.42	3.0263e-09	3.78031e-08
Lipid	Long Chain Fatty Acid	margarate (17:0)	HMDB02259	2.73	1.0043e-07	6.20124e-07
Lipid	Long Chain Fatty Acid	myristate (14:0)	HMDB00806	4.12	3.9376e-10	7.73792e-09
Lipid	Long Chain Fatty Acid	myristoleate (14:1n5)	HMDB02000	5.7	7.2008e-10	1.10562e-08
Lipid	Long Chain Fatty Acid	nervonate (24:1n9)*	HMDB02368	1.79	3.7181e-06	1.53086e-05
Lipid	Long Chain Fatty Acid	nonadecanoate (19:0)	HMDB00772	2.07	5.7407e-08	4.02942e-07
Lipid	Long Chain Fatty Acid	oleate/vaccenate (18:1)		2.51	1.9874e-09	2.87199e-08
Lipid	Long Chain Fatty Acid	palmitate (16:0)	HMDB00220	2.2	1.6477e-10	3.91727e-09
Lipid	Long Chain Fatty Acid	palmitoleate (16:1n7)	HMDB03229	4.74	3.3937e-10	6.94766e-09
Lipid	Long Chain Fatty Acid	pentadecanoate (15:0)	HMDB00826	2.04	2.6848e-09	3.53563e-08
Lipid	Long Chain Fatty Acid	stearate (18:0)	HMDB00827	1.8	2.567e-08	2.04307e-07
Lipid	Lysolipid	1-arachidonoyl-GPC (20:4n6)*	HMDB10395	0.87	0.0005	0.00121617
Lipid	Lysolipid	1-arachidonoyl-GPE (20:4n6)*	HMDB11517	0.89	0.038	0.0612823
Lipid	Lysolipid	1-arachidonoyl-GPI (20:4)*	HMDB61690	1.38	0.0385	0.0618181
Lipid	Lysolipid	1-lignoceroyl-GPC (24:0)		0.7	0.0001	0.000284556
Lipid	Lysolipid	1-linolenoyl-GPC (18:3)*		0.53	3.3292e-08	2.50369e-07
Lipid	Lysolipid	1-linolenoyl-GPE (18:3)*		0.49	7.1588e-06	2.7337e-05
Lipid	Lysolipid	1-linoleoyl-GPA (18:2)*	HMDB07856	1.18	0.1627	0.220694
Lipid	Lysolipid	1-linoleoyl-GPC (18:2)	HMDB10386	0.8	0.0005	0.00121617
Lipid	Lysolipid	1-linoleoyl-GPE (18:2)*	HMDB11507	0.65	2.9721e-06	1.23754e-05
Lipid	Lysolipid	1-linoleoyl-GPI (18:2)*		1.5	0.1249	0.175476
Lipid	Lysolipid	1-oleoyl-GPC (18:1)	HMDB02815	0.72	1.5529e-06	6.85322e-06
Lipid	Lysolipid	1-oleoyl-GPE (18:1)	HMDB11506	0.68	9.2611e-05	0.000277457
Lipid	Lysolipid	1-oleoyl-GPG (18:1)*		0.84	0.2505	0.318858
Lipid	Lysolipid	1-oleoyl-GPI (18:1)*		0.88	0.324	0.401324
Lipid	Lysolipid	1-palmitoleoyl-GPC (16:1)*	HMDB10383	0.56	2.5243e-09	3.4452e-08
Lipid	Lysolipid	1-palmitoyl-GPC (16:0)	HMDB10382	0.7	3.8356e-08	2.80782e-07
Lipid	Lysolipid	1-palmitoyl-GPE (16:0)	HMDB11503	0.65	3.0633e-07	1.62421e-06
Lipid	Lysolipid	1-stearoyl-GPC (18:0)	HMDB10384	0.47	3.6609e-09	4.49681e-08
Lipid	Lysolipid	1-stearoyl-GPE (18:0)	HMDB11130	0.58	4.7837e-08	3.45646e-07
Lipid	Lysolipid	1-stearoyl-GPI (18:0)	HMDB61696	0.8	0.0776	0.114154
Lipid	Lysolipid	2-palmitoleoyl-GPC (16:1)*		0.62	0.0064	0.0124783
Lipid	Lysolipid	2-palmitoyl-GPC (16:0)*	HMDB61702	0.65	1.605e-06	7.04098e-06
Lipid	Lysolipid	2-stearoyl-GPE (18:0)*		0.61	0.0003	0.000765052
Lipid	Lysoplasmalogen	1-(1-enyl-oleoyl)-2-linoleoyl-GPE (P-18:1/18:2)*		0.93	0.2122	0.274853
Lipid	Lysoplasmalogen	1-(1-enyl-oleoyl)-GPE (P-18:1)*		0.75	0.0244	0.0405932
Lipid	Lysoplasmalogen	1-(1-enyl-palmitoyl)-GPC (P-16:0)*		0.69	2.9589e-05	0.000101428
Lipid	Lysoplasmalogen	1-(1-enyl-palmitoyl)-GPE (P-16:0)*		0.75	0.003	0.00631714
Lipid	Lysoplasmalogen	1-(1-enyl-stearoyl)-GPE (P-18:0)*		0.7	0.0004	0.000995946
Lipid	Medium Chain Fatty Acid	10-undecenoate (11:1n1)		2.1	1.59e-08	1.37862e-07
Lipid	Medium Chain Fatty Acid	5-dodecenoate (12:1n7)	HMDB00529	5.36	4.8405e-10	8.70109e-09
Lipid	Medium Chain Fatty Acid	caprate (10:0)	HMDB00511	2.07	2.5781e-08	2.04307e-07
Lipid	Medium Chain Fatty Acid	caproate (6:0)	HMDB00535	1.41	6.0191e-08	4.10748e-07
Lipid	Medium Chain Fatty Acid	caprylate (8:0)	HMDB00482	1.77	4.605e-09	5.30295e-08
Lipid	Medium Chain Fatty Acid	heptanoate (7:0)	HMDB00666	0.87	0.9642	0.981684
Lipid	Medium Chain Fatty Acid	laurate (12:0)	HMDB00638	3.32	2.776e-08	2.15359e-07
Lipid	Mevalonate Metabolism	3-hydroxy-3-methylglutarate	HMDB00355	1.65	3.8479e-08	2.80782e-07
Lipid	Monoacylglycerol	1-linolenoylglycerol (18:3)	HMDB11569	0.52	0.0003	0.000765052
Lipid	Monoacylglycerol	1-linoleoylglycerol (18:2)		0.67	0.0354	0.0577208
Lipid	Monoacylglycerol	1-oleoylglycerol (18:1)	HMDB11567	0.59	0.0014	0.00317477
Lipid	Phosphatidylserine (PS)	1-stearoyl-2-oleoyl-GPS (18:0/18:1)		1.53	0.2453	0.313321
Lipid	Phospholipid Metabolism	1,2-dilinoleoyl-GPC (18:2/18:2)		0.7	6.8428e-05	0.000212791
Lipid	Phospholipid Metabolism	1,2-dilinoleoyl-GPE (18:2/18:2)*		0.39	0.0001	0.000284556
Lipid	Phospholipid Metabolism	1,2-dipalmitoyl-GPC (16:0/16:0)	HMDB00564	1.16	0.0018	0.00396
Lipid	Phospholipid Metabolism	1-linoleoyl-2-arachidonoyl-GPC (18:2/20:4n6)*		0.77	2.8876e-06	1.20918e-05
Lipid	Phospholipid Metabolism	1-linoleoyl-2-linolenoyl-GPC (18:2/18:3)*		0.49	3.1026e-07	1.6333e-06
Lipid	Phospholipid Metabolism	1-oleoyl-2-linoleoyl-GPC (18:1/18:2)*		0.73	0.0004	0.000995946
Lipid	Phospholipid Metabolism	1-palmitoleoyl-2-linolenoyl-GPC (16:1/18:3)*		0.48	0.1006	0.143686
Lipid	Phospholipid Metabolism	1-palmitoleoyl-2-linoleoyl-GPC (16:1/18:2)*		0.73	0.0066	0.0128343
Lipid	Phospholipid Metabolism	1-palmitoyl-2-alpha-linolenoyl-GPC (16:0/18:3n3)*		0.92	0.7954	0.842255
Lipid	Phospholipid Metabolism	1-palmitoyl-2-arachidonoyl-GPC (16:0/20:4n6)		1.13	0.0003	0.000765052
Lipid	Phospholipid Metabolism	1-palmitoyl-2-arachidonoyl-GPE (16:0/20:4)*	HMDB05323	0.93	0.5065	0.582356
Lipid	Phospholipid Metabolism	1-palmitoyl-2-arachidonoyl-GPI (16:0/20:4)*		0.58	4.7812e-09	5.42115e-08
Lipid	Phospholipid Metabolism	1-palmitoyl-2-linoleoyl-GPC (16:0/18:2)		1	0.7608	0.820383
Lipid	Phospholipid Metabolism	1-palmitoyl-2-linoleoyl-GPE (16:0/18:2)	HMDB05322	0.64	0.0011	0.00252555
Lipid	Phospholipid Metabolism	1-palmitoyl-2-linoleoyl-GPI (16:0/18:2)		0.69	2.8721e-05	9.8913e-05
Lipid	Phospholipid Metabolism	1-palmitoyl-2-oleoyl-GPC (16:0/18:1)		0.95	0.0718	0.106258
Lipid	Phospholipid Metabolism	1-palmitoyl-2-oleoyl-GPE (16:0/18:1)	HMDB05320	0.67	0.009	0.0169209
Lipid	Phospholipid Metabolism	1-palmitoyl-2-oleoyl-GPI (16:0/18:1)*		0.68	2.4835e-07	1.32633e-06
Lipid	Phospholipid Metabolism	1-palmitoyl-2-palmitoleoyl-GPC (16:0/16:1)*		0.67	4.8918e-05	0.000158125
Lipid	Phospholipid Metabolism	1-palmitoyl-2-stearoyl-GPC (16:0/18:0)		0.77	2.1054e-05	7.53243e-05
Lipid	Phospholipid Metabolism	1-stearoyl-2-arachidonoyl-GPC (18:0/20:4)		1	0.6759	0.742382
Lipid	Phospholipid Metabolism	1-stearoyl-2-arachidonoyl-GPE (18:0/20:4)		0.95	0.9705	0.985205
Lipid	Phospholipid Metabolism	1-stearoyl-2-arachidonoyl-GPI (18:0/20:4)		0.91	0.0108	0.0198494
Lipid	Phospholipid Metabolism	1-stearoyl-2-linoleoyl-GPC (18:0/18:2)*		0.81	1.272e-07	7.62166e-07
Lipid	Phospholipid Metabolism	1-stearoyl-2-linoleoyl-GPE (18:0/18:2)*		0.55	1.0169e-05	3.78513e-05
Lipid	Phospholipid Metabolism	1-stearoyl-2-linoleoyl-GPI (18:0/18:2)		0.85	0.0023	0.00497097
Lipid	Phospholipid Metabolism	1-stearoyl-2-oleoyl-GPC (18:0/18:1)		0.62	1.6797e-11	7.88682e-10
Lipid	Phospholipid Metabolism	1-stearoyl-2-oleoyl-GPE (18:0/18:1)		0.55	0.0002	0.000534058
Lipid	Phospholipid Metabolism	1-stearoyl-2-oleoyl-GPI (18:0/18:1)*		0.64	8.3132e-08	5.42197e-07
Lipid	Phospholipid Metabolism	arachidonoylcholine		0.7	0.0136	0.0244468
Lipid	Phospholipid Metabolism	choline	HMDB00097	0.9	0.0185	0.0320812
Lipid	Phospholipid Metabolism	choline phosphate	HMDB01565	1.02	0.7439	0.807444
Lipid	Phospholipid Metabolism	glycerophosphoethanolamine	HMDB00114	0.84	0.0833	0.121474
Lipid	Phospholipid Metabolism	glycerophosphorylcholine (GPC)	HMDB00086	0.68	3.8153e-05	0.000126093
Lipid	Phospholipid Metabolism	phosphoethanolamine	HMDB00224	1.41	0.0598	0.0897609
Lipid	Phospholipid Metabolism	trimethylamine N-oxide	HMDB00925	1.15	0.7428	0.807439
Lipid	Plasmalogen	1-(1-enyl-palmitoyl)-2-arachidonoyl-GPC (P-16:0/20:4)*		1.2	2.3185e-08	1.89859e-07
Lipid	Plasmalogen	1-(1-enyl-palmitoyl)-2-arachidonoyl-GPE (P-16:0/20:4)*		0.91	0.386	0.46484
Lipid	Plasmalogen	1-(1-enyl-palmitoyl)-2-linoleoyl-GPC (P-16:0/18:2)*		1.32	8.5859e-08	5.50244e-07
Lipid	Plasmalogen	1-(1-enyl-palmitoyl)-2-linoleoyl-GPE (P-16:0/18:2)*		1.01	0.3079	0.383315
Lipid	Plasmalogen	1-(1-enyl-palmitoyl)-2-oleoyl-GPC (P-16:0/18:1)*		1.39	7.1824e-09	7.27318e-08
Lipid	Plasmalogen	1-(1-enyl-palmitoyl)-2-oleoyl-GPE (P-16:0/18:1)*		0.96	0.6151	0.683754
Lipid	Plasmalogen	1-(1-enyl-palmitoyl)-2-palmitoleoyl-GPC (P-16:0/16:1)*		1.63	1.654e-11	7.88682e-10
Lipid	Plasmalogen	1-(1-enyl-palmitoyl)-2-palmitoyl-GPC (P-16:0/16:0)*		1.37	1.5646e-08	1.37275e-07
Lipid	Plasmalogen	1-(1-enyl-stearoyl)-2-arachidonoyl-GPE (P-18:0/20:4)*	HMDB05779	0.88	0.1828	0.242745
Lipid	Plasmalogen	1-(1-enyl-stearoyl)-2-linoleoyl-GPE (P-18:0/18:2)*		0.87	0.0159	0.0281014
Lipid	Plasmalogen	1-(1-enyl-stearoyl)-2-oleoyl-GPE (P-18:0/18:1)		0.79	3.4834e-05	0.000116439
Lipid	Polyunsaturated Fatty Acid (n3 and n6)	adrenate (22:4n6)	HMDB02226	2.39	0.0007	0.00165353
Lipid	Polyunsaturated Fatty Acid (n3 and n6)	arachidonate (20:4n6)	HMDB01043	1.6	8.3355e-05	0.000254907
Lipid	Polyunsaturated Fatty Acid (n3 and n6)	dihomo-linoleate (20:2n6)	HMDB05060	3.93	1.6151e-07	9.37267e-07
Lipid	Polyunsaturated Fatty Acid (n3 and n6)	dihomo-linolenate (20:3n3 or n6)	HMDB02925	1.69	0.0002	0.000534058
Lipid	Polyunsaturated Fatty Acid (n3 and n6)	docosadienoate (22:2n6)	HMDB61714	3.12	4.3951e-09	5.21691e-08
Lipid	Polyunsaturated Fatty Acid (n3 and n6)	docosahexaenoate (DHA; 22:6n3)	HMDB02183	1.84	2.1201e-05	7.54838e-05
Lipid	Polyunsaturated Fatty Acid (n3 and n6)	docosapentaenoate (n3 DPA; 22:5n3)	HMDB01976	2.73	1.2427e-06	5.58457e-06
Lipid	Polyunsaturated Fatty Acid (n3 and n6)	docosapentaenoate (n6 DPA; 22:5n6)	HMDB01976	1.49	0.0003	0.000765052
Lipid	Polyunsaturated Fatty Acid (n3 and n6)	eicosapentaenoate (EPA; 20:5n3)	HMDB01999	1.89	3.2584e-05	0.000110665
Lipid	Polyunsaturated Fatty Acid (n3 and n6)	linoleate (18:2n6)	HMDB00673	2.86	9.2171e-09	9.05734e-08
Lipid	Polyunsaturated Fatty Acid (n3 and n6)	linolenate [alpha or gamma; (18:3n3 or 6)]	HMDB03073	4.06	2.6865e-09	3.53563e-08
Lipid	Polyunsaturated Fatty Acid (n3 and n6)	mead acid (20:3n9)	HMDB10378	1.86	9.1185e-05	0.000274299
Lipid	Polyunsaturated Fatty Acid (n3 and n6)	stearidonate (18:4n3)	HMDB06547	3.16	1.306e-07	7.76227e-07
Lipid	Primary Bile Acid Metabolism	chenodeoxycholate	HMDB00518	0.64	0.0803	0.117891
Lipid	Primary Bile Acid Metabolism	cholate	HMDB00619	0.51	0.0124	0.0225094
Lipid	Primary Bile Acid Metabolism	glycochenodeoxycholate	HMDB00637	0.82	0.5931	0.666333
Lipid	Primary Bile Acid Metabolism	glycochenodeoxycholate glucuronide (1)		0.68	0.0479	0.0737
Lipid	Primary Bile Acid Metabolism	glycochenodeoxycholate sulfate		1.28	0.018	0.0313617
Lipid	Primary Bile Acid Metabolism	glycocholate	HMDB00138	0.78	0.682	0.746856
Lipid	Primary Bile Acid Metabolism	taurochenodeoxycholate	HMDB00951	1.16	0.1497	0.205838
Lipid	Primary Bile Acid Metabolism	taurocholate	HMDB00036	0.74	0.7887	0.838776
Lipid	Secondary Bile Acid Metabolism	deoxycholate	HMDB00626	0.34	0.0056	0.0112152
Lipid	Secondary Bile Acid Metabolism	glycocholenate sulfate*		1.05	0.5441	0.61883
Lipid	Secondary Bile Acid Metabolism	glycodeoxycholate	HMDB00631	0.62	0.1397	0.194629
Lipid	Secondary Bile Acid Metabolism	glycodeoxycholate sulfate		1.09	0.0648	0.0968714
Lipid	Secondary Bile Acid Metabolism	glycohyocholate		1.06	0.0371	0.0600938
Lipid	Secondary Bile Acid Metabolism	glycolithocholate sulfate*	HMDB02639	1.21	0.0184	0.031983
Lipid	Secondary Bile Acid Metabolism	glycoursodeoxycholate	HMDB00708	0.67	0.2316	0.297368
Lipid	Secondary Bile Acid Metabolism	hyocholate	HMDB00760	0.81	0.1922	0.253401
Lipid	Secondary Bile Acid Metabolism	isoursodeoxycholate	HMDB00686	0.49	0.0004	0.000995946
Lipid	Secondary Bile Acid Metabolism	taurocholenate sulfate		1.56	0.0024	0.00515685
Lipid	Secondary Bile Acid Metabolism	taurodeoxycholate	HMDB00896	0.82	0.9622	0.981684
Lipid	Secondary Bile Acid Metabolism	taurolithocholate 3-sulfate	HMDB02580	1.89	4.7039e-05	0.000152721
Lipid	Secondary Bile Acid Metabolism	ursodeoxycholate	HMDB00946	0.37	0.0009	0.00207281
Lipid	Sphingolipid Metabolism	behenoyl dihydrosphingomyelin (d18:0/22:0)*		1.46	0.0002	0.000534058
Lipid	Sphingolipid Metabolism	behenoyl sphingomyelin (d18:1/22:0)*		1.15	0.0003	0.000765052
Lipid	Sphingolipid Metabolism	glycosyl-N-behenoyl-sphingadienine (d18:2/22:0)*		1.15	4.6569e-05	0.000151864
Lipid	Sphingolipid Metabolism	glycosyl-N-palmitoyl-sphingosine (d18:1/16:0)		1.18	0.0002	0.000534058
Lipid	Sphingolipid Metabolism	lactosyl-N-nervonoyl-sphingosine (d18:1/24:1)*		1.14	1.6781e-05	6.06255e-05
Lipid	Sphingolipid Metabolism	lactosyl-N-palmitoyl-sphingosine (d18:1/16:0)		1.13	2.6916e-05	9.31319e-05
Lipid	Sphingolipid Metabolism	lignoceroyl sphingomyelin (d18:1/24:0)		1.24	9.4363e-06	3.54824e-05
Lipid	Sphingolipid Metabolism	myristoyl dihydrosphingomyelin (d18:0/14:0)*		0.9	0.046	0.0712227
Lipid	Sphingolipid Metabolism	N-behenoyl-sphingadienine (d18:2/22:0)*		0.66	9.3639e-05	0.000279401
Lipid	Sphingolipid Metabolism	N-palmitoyl-sphinganine (d18:0/16:0)	HMDB11760	1.02	0.4963	0.572761
Lipid	Sphingolipid Metabolism	N-palmitoyl-sphingosine (d18:1/16:0)	HMDB04949	0.89	0.004	0.0082117
Lipid	Sphingolipid Metabolism	N-stearoyl-sphingosine (d18:1/18:0)*	HMDB04950	0.84	0.0034	0.00705859
Lipid	Sphingolipid Metabolism	palmitoyl dihydrosphingomyelin (d18:0/16:0)*		1.17	5.6949e-05	0.000180911
Lipid	Sphingolipid Metabolism	palmitoyl sphingomyelin (d18:1/16:0)		1.06	0.0062	0.0121527
Lipid	Sphingolipid Metabolism	sphinganine	HMDB00269	0.94	0.9366	0.962726
Lipid	Sphingolipid Metabolism	sphinganine-1-phosphate	HMDB01383	0.9	0.1646	0.22245
Lipid	Sphingolipid Metabolism	sphingomyelin (d17:2/16:0, d18:2/15:0)*		0.96	0.3929	0.471608
Lipid	Sphingolipid Metabolism	sphingomyelin (d18:0/18:0, d19:0/17:0)*		1.62	7.3398e-06	2.78837e-05
Lipid	Sphingolipid Metabolism	sphingomyelin (d18:0/20:0, d16:0/22:0)*		1.41	0.0007	0.00165353
Lipid	Sphingolipid Metabolism	sphingomyelin (d18:1/14:0, d16:1/16:0)*		0.96	0.4424	0.521678
Lipid	Sphingolipid Metabolism	sphingomyelin (d18:1/15:0, d16:1/17:0)*		1.06	0.0729	0.10767
Lipid	Sphingolipid Metabolism	sphingomyelin (d18:1/17:0, d17:1/18:0, d19:1/16:0)		1.13	0.0009	0.00207281
Lipid	Sphingolipid Metabolism	sphingomyelin (d18:1/18:1, d18:2/18:0)		1.24	2.1975e-07	1.20863e-06
Lipid	Sphingolipid Metabolism	sphingomyelin (d18:1/19:0, d19:1/18:0)*		1.16	0.0003	0.000765052
Lipid	Sphingolipid Metabolism	sphingomyelin (d18:1/20:0, d16:1/22:0)*		1.24	1.5001e-08	1.34826e-07
Lipid	Sphingolipid Metabolism	sphingomyelin (d18:1/20:1, d18:2/20:0)*		1.36	2.431e-08	1.96884e-07
Lipid	Sphingolipid Metabolism	sphingomyelin (d18:1/20:2, d18:2/20:1, d16:1/22:2)*		1.26	0.0121	0.022019
Lipid	Sphingolipid Metabolism	sphingomyelin (d18:1/21:0, d17:1/22:0, d16:1/23:0)*		1.12	0.0103	0.0190253
Lipid	Sphingolipid Metabolism	sphingomyelin (d18:1/22:1, d18:2/22:0, d16:1/24:1)*		1.25	2.4716e-05	8.61456e-05
Lipid	Sphingolipid Metabolism	sphingomyelin (d18:1/22:2, d18:2/22:1, d16:1/24:2)*		1.16	0.0003	0.000765052
Lipid	Sphingolipid Metabolism	sphingomyelin (d18:1/24:1, d18:2/24:0)*		1.08	0.0019	0.0041429
Lipid	Sphingolipid Metabolism	sphingomyelin (d18:1/25:0, d19:0/24:1, d20:1/23:0, d19:1/24:0)*		1.05	0.2693	0.339853
Lipid	Sphingolipid Metabolism	sphingomyelin (d18:2/14:0, d18:1/14:1)*		0.77	8.8387e-08	5.61562e-07
Lipid	Sphingolipid Metabolism	sphingomyelin (d18:2/16:0, d18:1/16:1)*		1.15	1.8487e-06	8.06208e-06
Lipid	Sphingolipid Metabolism	sphingomyelin (d18:2/18:1)*		1.25	9.0355e-07	4.18815e-06
Lipid	Sphingolipid Metabolism	sphingomyelin (d18:2/21:0, d16:2/23:0)*		1.04	0.2568	0.325318
Lipid	Sphingolipid Metabolism	sphingomyelin (d18:2/23:0, d18:1/23:1, d17:1/24:1)*		1.1	0.0407	0.0643689
Lipid	Sphingolipid Metabolism	sphingomyelin (d18:2/23:1)*		1	0.9814	0.99217
Lipid	Sphingolipid Metabolism	sphingomyelin (d18:2/24:1, d18:1/24:2)*		1.13	0.0002	0.000534058
Lipid	Sphingolipid Metabolism	sphingomyelin (d18:2/24:2)*		1.16	0.0032	0.0067
Lipid	Sphingolipid Metabolism	sphingosine	HMDB00252	0.97	0.3944	0.471871
Lipid	Sphingolipid Metabolism	sphingosine 1-phosphate	HMDB00277	0.81	0.0046	0.00931374
Lipid	Sphingolipid Metabolism	stearoyl sphingomyelin (d18:1/18:0)	HMDB01348	1.39	3.7355e-08	2.78087e-07
Lipid	Sphingolipid Metabolism	tricosanoyl sphingomyelin (d18:1/23:0)*		1.11	0.0058	0.011553
Lipid	Steroid	16a-hydroxy DHEA 3-sulfate		1.7	5.9056e-07	2.86344e-06
Lipid	Steroid	17alpha-hydroxypregnenolone 3-sulfate	HMDB00416	0.82	0.0059	0.011689
Lipid	Steroid	21-hydroxypregnenolone disulfate	HMDB04026	1.34	1.1291e-05	4.16073e-05
Lipid	Steroid	5alpha-androstan-3alpha,17alpha-diol monosulfate		1.24	0.2121	0.274853
Lipid	Steroid	5alpha-androstan-3alpha,17beta-diol disulfate		1.12	0.0096	0.0178217
Lipid	Steroid	5alpha-androstan-3alpha,17beta-diol monosulfate (1)		1.17	0.0229	0.0385326
Lipid	Steroid	5alpha-androstan-3alpha,17beta-diol monosulfate (2)		0.8	0.0019	0.0041429
Lipid	Steroid	5alpha-androstan-3beta,17alpha-diol disulfate		1.5	0.0009	0.00207281
Lipid	Steroid	5alpha-androstan-3beta,17beta-diol disulfate	HMDB00493	1	0.5951	0.666548
Lipid	Steroid	5alpha-androstan-3beta,17beta-diol monosulfate (2)		1.18	0.0166	0.0291986
Lipid	Steroid	5alpha-pregnan-3(alpha or beta),20beta-diol disulfate		1.57	0.013	0.0234828
Lipid	Steroid	5alpha-pregnan-3beta,20alpha-diol disulfate		1.23	0.0003	0.000765052
Lipid	Steroid	5alpha-pregnan-3beta,20alpha-diol monosulfate (2)		1.16	0.4489	0.527654
Lipid	Steroid	5alpha-pregnan-3beta,20beta-diol monosulfate (1)		1.14	0.5591	0.63296
Lipid	Steroid	andro steroid monosulfate (1)*	HMDB02759	1.66	8.6355e-07	4.02808e-06
Lipid	Steroid	androstenediol (3alpha, 17alpha) monsulfate (2)		0.57	8.6108e-07	4.02808e-06
Lipid	Steroid	androstenediol (3alpha, 17alpha) monsulfate (3)		1.24	0.0001	0.000284556
Lipid	Steroid	androstenediol (3beta,17beta) disulfate (1)	HMDB03818	1.21	3.9842e-06	1.63131e-05
Lipid	Steroid	androstenediol (3beta,17beta) disulfate (2)	HMDB03818	1.4	2.6232e-08	2.0567e-07
Lipid	Steroid	androstenediol (3beta,17beta) monosulfate (1)	HMDB03818	1.55	1.7577e-08	1.50631e-07
Lipid	Steroid	androstenediol (3beta,17beta) monosulfate (2)		0.78	4.2238e-06	1.71041e-05
Lipid	Steroid	androsterone sulfate	HMDB02759	1.08	0.536	0.611505
Lipid	Steroid	corticosterone	HMDB01547	0.9	0.0431	0.0675845
Lipid	Steroid	cortisol	HMDB00063	0.88	0.1311	0.183341
Lipid	Steroid	cortisone	HMDB02802	0.92	0.0258	0.0427294
Lipid	Steroid	dehydroisoandrosterone sulfate (DHEA-S)	HMDB01032	1.4	1.3522e-08	1.26148e-07
Lipid	Steroid	epiandrosterone sulfate	HMDB00365	1.1	0.1883	0.248704
Lipid	Steroid	etiocholanolone glucuronide		0.91	0.0114	0.0207965
Lipid	Steroid	pregn steroid monosulfate*		1.28	3.6367e-05	0.000120732
Lipid	Steroid	pregnanediol-3-glucuronide		1.21	0.3883	0.466847
Lipid	Steroid	pregnen-diol disulfate*		1.48	7.139e-10	1.10562e-08
Lipid	Steroid	pregnenolone sulfate	HMDB00774	0.99	0.3544	0.432438
Lipid	Sterol	3beta-hydroxy-5-cholestenoate		1.19	0.0006	0.00145461
Lipid	Sterol	4-cholesten-3-one	HMDB00921	0.87	0.0522	0.0796509
Lipid	Sterol	7-alpha-hydroxy-3-oxo-4-cholestenoate (7-Hoca)	HMDB12458	0.81	0.0002	0.000534058
Lipid	Sterol	beta-sitosterol	HMDB00852	1.04	0.3311	0.40738
Lipid	Sterol	campesterol	HMDB02869	1.04	0.1473	0.203296
Lipid	Sterol	cholesterol	HMDB00067	0.75	0.0078	0.0148927
Nucleotide	Purine Metabolism, (Hypo)Xanthine/Inosine containing	allantoin	HMDB00462	1.03	0.239	0.305804
Nucleotide	Purine Metabolism, (Hypo)Xanthine/Inosine containing	hypoxanthine	HMDB00157	0.99	0.6847	0.747591
Nucleotide	Purine Metabolism, (Hypo)Xanthine/Inosine containing	inosine	HMDB00195	1.79	0.0378	0.0610934
Nucleotide	Purine Metabolism, (Hypo)Xanthine/Inosine containing	N1-methylinosine	HMDB02721	1.02	0.7802	0.833664
Nucleotide	Purine Metabolism, (Hypo)Xanthine/Inosine containing	urate	HMDB00289	1.29	8.5144e-09	8.47988e-08
Nucleotide	Purine Metabolism, (Hypo)Xanthine/Inosine containing	xanthine	HMDB00292	1.06	0.1854	0.245755
Nucleotide	Purine Metabolism, Adenine containing	adenine	HMDB00034	1.09	0.1149	0.163162
Nucleotide	Purine Metabolism, Adenine containing	adenosine	HMDB00050	1.04	0.3938	0.471871
Nucleotide	Purine Metabolism, Adenine containing	adenosine 3',5'-cyclic monophosphate (cAMP)	HMDB00058	1.01	0.8796	0.912491
Nucleotide	Purine Metabolism, Adenine containing	adenosine 5'-monophosphate (AMP)	HMDB00045	1.04	0.8563	0.892635
Nucleotide	Purine Metabolism, Adenine containing	N1-methyladenosine	HMDB03331	1.04	0.5794	0.652932
Nucleotide	Purine Metabolism, Adenine containing	N6-carbamoylthreonyladenosine	HMDB41623	1.06	0.2053	0.267325
Nucleotide	Purine Metabolism, Adenine containing	N6-methyladenosine	HMDB04044	0.72	0.0022	0.00476882
Nucleotide	Purine Metabolism, Guanine containing	7-methylguanine	HMDB00897	1.05	0.0999	0.142964
Nucleotide	Purine Metabolism, Guanine containing	N2,N2-dimethylguanosine	HMDB04824	1.09	0.0025	0.0053561
Nucleotide	Pyrimidine Metabolism, Cytidine containing	2'-O-methylcytidine		0.97	0.3749	0.453697
Nucleotide	Pyrimidine Metabolism, Cytidine containing	3-methylcytidine		0.95	0.0834	0.121474
Nucleotide	Pyrimidine Metabolism, Cytidine containing	cytidine	HMDB00089	1.32	0.0446	0.0693464
Nucleotide	Pyrimidine Metabolism, Cytidine containing	N4-acetylcytidine	HMDB05923	1.28	0.0691	0.102882
Nucleotide	Pyrimidine Metabolism, Orotate containing	dihydroorotate	HMDB03349	0.72	0.0132	0.0237858
Nucleotide	Pyrimidine Metabolism, Orotate containing	orotate	HMDB00226	1.12	0.009	0.0169209
Nucleotide	Pyrimidine Metabolism, Orotate containing	orotidine	HMDB00788	1.01	0.557	0.631552
Nucleotide	Pyrimidine Metabolism, Thymine containing	3-aminoisobutyrate	HMDB03911	1.44	6.2362e-06	2.41899e-05
Nucleotide	Pyrimidine Metabolism, Thymine containing	5,6-dihydrothymine	HMDB00079	0.94	0.1595	0.217286
Nucleotide	Pyrimidine Metabolism, Uracil containing	2'-deoxyuridine	HMDB00012	0.77	0.0045	0.00918698
Nucleotide	Pyrimidine Metabolism, Uracil containing	3-ureidopropionate	HMDB00026	1.14	0.0283	0.046556
Nucleotide	Pyrimidine Metabolism, Uracil containing	5-methyluridine (ribothymidine)	HMDB00884	1.09	0.0101	0.0187028
Nucleotide	Pyrimidine Metabolism, Uracil containing	beta-alanine	HMDB00056	0.84	0.0015	0.00337043
Nucleotide	Pyrimidine Metabolism, Uracil containing	N-acetyl-beta-alanine		1.19	0.0176	0.0308105
Nucleotide	Pyrimidine Metabolism, Uracil containing	pseudouridine	HMDB00767	1.04	0.1648	0.22245
Nucleotide	Pyrimidine Metabolism, Uracil containing	uracil	HMDB00300	0.7	0.3298	0.406459
Nucleotide	Pyrimidine Metabolism, Uracil containing	uridine	HMDB00296	0.99	0.6334	0.698826
Peptide	Acetylated Peptides	4-hydroxyphenylacetylglutamine		0.82	0.2113	0.274653
Peptide	Acetylated Peptides	phenylacetylcarnitine		1.21	0.1491	0.205396
Peptide	Acetylated Peptides	phenylacetylglutamate	HMDB59772	1.27	0.0138	0.024746
Peptide	Acetylated Peptides	phenylacetylglutamine	HMDB06344	1.24	0.0017	0.00376246
Peptide	Dipeptide	glycylleucine	HMDB00759	0.68	0.0187	0.0323519
Peptide	Dipeptide	isoleucylglycine		0.59	0.386	0.46484
Peptide	Dipeptide	leucylglycine		1.04	0.8285	0.869807
Peptide	Dipeptide	phenylalanylalanine		0.8	0.0013	0.00296625
Peptide	Dipeptide	phenylalanylglycine		0.94	0.7924	0.840286
Peptide	Dipeptide	prolylglycine		0.59	0.0019	0.0041429
Peptide	Dipeptide	valylglycine	HMDB29127	0.84	0.5949	0.666548
Peptide	Dipeptide	valylleucine	HMDB29131	0.86	0.0531	0.0806901
Peptide	Dipeptide Derivative	N-acetylcarnosine	HMDB12881	1.02	0.9783	0.990394
Peptide	Gamma-glutamyl Amino Acid	gamma-glutamyl-2-aminobutyrate		1.42	2.1032e-05	7.53243e-05
Peptide	Gamma-glutamyl Amino Acid	gamma-glutamylalanine	HMDB29142	0.52	6.1522e-05	0.0001946
Peptide	Gamma-glutamyl Amino Acid	gamma-glutamyl-alpha-lysine		0.76	9.9305e-05	0.000284556
Peptide	Gamma-glutamyl Amino Acid	gamma-glutamyl-epsilon-lysine	HMDB03869	0.77	0.0002	0.000534058
Peptide	Gamma-glutamyl Amino Acid	gamma-glutamylglutamate	HMDB11737	0.62	1.3128e-06	5.86384e-06
Peptide	Gamma-glutamyl Amino Acid	gamma-glutamylglutamine	HMDB11738	0.85	0.0013	0.00296625
Peptide	Gamma-glutamyl Amino Acid	gamma-glutamylglycine	HMDB11667	0.85	0.0005	0.00121617
Peptide	Gamma-glutamyl Amino Acid	gamma-glutamylhistidine		0.84	0.0059	0.011689
Peptide	Gamma-glutamyl Amino Acid	gamma-glutamylisoleucine*	HMDB11170	0.95	0.4588	0.536723
Peptide	Gamma-glutamyl Amino Acid	gamma-glutamylleucine	HMDB11171	0.96	0.6838	0.747591
Peptide	Gamma-glutamyl Amino Acid	gamma-glutamylmethionine	HMDB29155	0.89	0.0488	0.0749283
Peptide	Gamma-glutamyl Amino Acid	gamma-glutamylphenylalanine	HMDB00594	0.95	0.4966	0.572761
Peptide	Gamma-glutamyl Amino Acid	gamma-glutamylthreonine	HMDB29159	0.77	0.2142	0.276957
Peptide	Gamma-glutamyl Amino Acid	gamma-glutamyltryptophan	HMDB29160	0.95	0.4986	0.574169
Peptide	Gamma-glutamyl Amino Acid	gamma-glutamyltyrosine	HMDB11741	0.86	0.0078	0.0148927
Peptide	Gamma-glutamyl Amino Acid	gamma-glutamylvaline	HMDB11172	0.67	2.4428e-07	1.31982e-06
Peptide	Polypeptide	bradykinin	HMDB04246	0.98	0.7805	0.833664
Peptide	Polypeptide	bradykinin, hydroxy-pro(3)	HMDB11728	0.98	0.9735	0.986891
Peptide	Polypeptide	HWESASLLR		0.09	5.8732e-08	4.05749e-07
Peptide	Polypeptide	HWESASXX*		0.15	7.9058e-07	3.75908e-06
Xenobiotics	Bacterial/Fungal	tartronate (hydroxymalonate)	HMDB35227	0.75	0.0002	0.000534058
Xenobiotics	Benzoate Metabolism	2-hydroxyhippurate (salicylurate)	HMDB00840	0.78	0.0462	0.0713824
Xenobiotics	Benzoate Metabolism	3-hydroxyhippurate	HMDB06116	0.39	0.0003	0.000765052
Xenobiotics	Benzoate Metabolism	3-methoxycatechol sulfate (1)		0.8	0.2351	0.301337
Xenobiotics	Benzoate Metabolism	3-methyl catechol sulfate (1)		1.96	0.5203	0.595427
Xenobiotics	Benzoate Metabolism	3-methyl catechol sulfate (2)		3.03	0.0716	0.106175
Xenobiotics	Benzoate Metabolism	4-ethylphenylsulfate#		17.94	1.8798e-06	8.14949e-06
Xenobiotics	Benzoate Metabolism	4-hydroxyhippurate	HMDB13678	0.65	0.0142	0.0254015
Xenobiotics	Benzoate Metabolism	4-methylcatechol sulfate		0.88	0.7623	0.820383
Xenobiotics	Benzoate Metabolism	4-vinylphenol sulfate	HMDB04072	0.57	0.0033	0.0068898
Xenobiotics	Benzoate Metabolism	benzoate	HMDB01870	1.02	0.7902	0.839161
Xenobiotics	Benzoate Metabolism	catechol sulfate	HMDB59724	0.87	0.1575	0.214958
Xenobiotics	Benzoate Metabolism	hippurate	HMDB00714	0.93	0.279	0.348514
Xenobiotics	Benzoate Metabolism	methyl-4-hydroxybenzoate sulfate		0.32	0.0017	0.00376246
Xenobiotics	Benzoate Metabolism	O-methylcatechol sulfate		1.1	0.7848	0.835835
Xenobiotics	Chemical	1,2,3-benzenetriol sulfate (2)		0.64	0.0154	0.0273489
Xenobiotics	Chemical	2-aminophenol sulfate	HMDB61116	1.05	0.6005	0.670893
Xenobiotics	Chemical	2-methoxyresorcinol sulfate		0.55	0.0018	0.00396
Xenobiotics	Chemical	3-acetylphenol sulfate		0.96	0.315	0.391492
Xenobiotics	Chemical	3-hydroxypyridine sulfate		0.8	0.8336	0.873303
Xenobiotics	Chemical	4-hydroxychlorothalonil		1.13	5.3943e-08	3.82269e-07
Xenobiotics	Chemical	6-hydroxyindole sulfate		0.92	0.6281	0.694018
Xenobiotics	Chemical	benzoylcarnitine*		1.17	0.0088	0.0166297
Xenobiotics	Chemical	dexpanthenol	HMDB04231	2.29	0.2531	0.321612
Xenobiotics	Chemical	dimethyl sulfone	HMDB04983	1.29	0.0002	0.000534058
Xenobiotics	Chemical	EDTA	HMDB15109	0.96	0.0387	0.0620041
Xenobiotics	Chemical	iminodiacetate (IDA)	HMDB11753	0.94	0.0389	0.0621894
Xenobiotics	Chemical	lanthionine		1.15	0.0973	0.139514
Xenobiotics	Chemical	N-methylpipecolate		0.94	0.5696	0.643858
Xenobiotics	Chemical	O-sulfo-L-tyrosine		0.98	0.8171	0.86152
Xenobiotics	Chemical	perfluorooctanesulfonic acid (PFOS)	HMDB59586	1.02	0.0865	0.125741
Xenobiotics	Chemical	succinimide		1.29	0.0001	0.000284556
Xenobiotics	Chemical	sulfate*	HMDB01448	1.05	0.1936	0.254791
Xenobiotics	Drug	2-acetamidophenol sulfate		1.38	0.8402	0.878337
Xenobiotics	Drug	2-hydroxyacetaminophen sulfate*		1	1	1
Xenobiotics	Drug	2-methoxyacetaminophen sulfate*		1	1	1
Xenobiotics	Drug	3-(N-acetyl-L-cystein-S-yl) acetaminophen		1	1	1
Xenobiotics	Drug	4-acetamidophenol	HMDB01859	1	1	1
Xenobiotics	Drug	4-acetamidophenylglucuronide	HMDB10316	1	1	1
Xenobiotics	Drug	4-acetaminophen sulfate	HMDB59911	1	1	1
Xenobiotics	Drug	4-acetylphenol sulfate#		4.97	0.0005	0.00121617
Xenobiotics	Drug	4-hydroxycoumarin		0.88	0.0827	0.120932
Xenobiotics	Drug	doxycycline		1	0.3531	0.431567
Xenobiotics	Drug	hydroquinone sulfate	HMDB02434	0.81	0.1826	0.242745
Xenobiotics	Drug	pivaloylcarnitine (C5)	HDMB41993	1	1	1
Xenobiotics	Drug	salicylate	HMDB01895	1.08	0.9157	0.945197
Xenobiotics	Food Component/Plant	2,3-dihydroxyisovalerate	HMDB12141	0.94	0.5532	0.62821
Xenobiotics	Food Component/Plant	2-keto-3-deoxy-gluconate	HMDB01353	0.97	0.6141	0.683673
Xenobiotics	Food Component/Plant	2-oxindole-3-acetate		0.48	0.8455	0.882625
Xenobiotics	Food Component/Plant	2-piperidinone		1.01	0.7751	0.831512
Xenobiotics	Food Component/Plant	3,4-methyleneheptanoate		3.32	1.5371e-06	6.82435e-06
Xenobiotics	Food Component/Plant	4-allylphenol sulfate		0.38	7.1143e-08	4.72252e-07
Xenobiotics	Food Component/Plant	acesulfame		0.09	8.5598e-07	4.02808e-06
Xenobiotics	Food Component/Plant	alliin	HMDB33592	1.4	0.1434	0.198658
Xenobiotics	Food Component/Plant	beta-cryptoxanthin		1.14	0.0967	0.138924
Xenobiotics	Food Component/Plant	betonicine	HMDB29412	0.48	0.0007	0.00165353
Xenobiotics	Food Component/Plant	cinnamoylglycine	HMDB11621	1.82	5.6436e-05	0.000180058
Xenobiotics	Food Component/Plant	dihydroferulic acid		0.69	0.1734	0.231934
Xenobiotics	Food Component/Plant	ergothioneine	HMDB03045	1.04	0.4349	0.513656
Xenobiotics	Food Component/Plant	erythritol	HMDB02994	0.85	0.0001	0.000284556
Xenobiotics	Food Component/Plant	eugenol sulfate		0.12	1.1067e-05	4.09868e-05
Xenobiotics	Food Component/Plant	ferulic acid 4-sulfate	HMDB29200	1.14	0.9239	0.952328
Xenobiotics	Food Component/Plant	gluconate	HMDB00625	0.76	2.194e-05	7.77393e-05
Xenobiotics	Food Component/Plant	homostachydrine*	HMDB33433	0.62	2.9719e-08	2.25803e-07
Xenobiotics	Food Component/Plant	methyl glucopyranoside (alpha + beta)		0.4	1.4852e-05	5.41877e-05
Xenobiotics	Food Component/Plant	methyl indole-3-acetate	HMDB29738	1.26	0.025	0.0414977
Xenobiotics	Food Component/Plant	N-(2-furoyl)glycine	HMDB00439	0.73	0.0506	0.0775306
Xenobiotics	Food Component/Plant	N-acetylalliin		0.99	0.9645	0.981684
Xenobiotics	Food Component/Plant	piperine	HMDB29377	0.83	0.204	0.266574
Xenobiotics	Food Component/Plant	pyrraline		1.09	0.5724	0.646032
Xenobiotics	Food Component/Plant	quinate	HMDB03072	0.32	0.0232	0.0389485
Xenobiotics	Food Component/Plant	S-allylcysteine		0.56	0.0008	0.00186582
Xenobiotics	Food Component/Plant	stachydrine	HMDB04827	0.32	3e-15	2.211e-12
Xenobiotics	Food Component/Plant	sucralose	HMDB31554	1.37	0.8215	0.864922
Xenobiotics	Food Component/Plant	syringol sulfate		12.63	0.026	0.0429641
Xenobiotics	Food Component/Plant	tartarate	HMDB00956	1.55	0.9289	0.956144
Xenobiotics	Food Component/Plant	thymol sulfate	HMDB01878	5.94	0.0088	0.0166297
Xenobiotics	Tobacco Metabolite	3-hydroxycotinine glucuronide		0.78	0.1416	0.196904
Xenobiotics	Tobacco Metabolite	cotinine	HMDB01046	0.46	0.3963	0.473087
Xenobiotics	Tobacco Metabolite	cotinine N-oxide	HMDB01411	0.74	0.0434	0.0679104
Xenobiotics	Tobacco Metabolite	hydroxycotinine	HMDB01390	0.67	0.0244	0.0405932
Xenobiotics	Xanthine Metabolism	1,3,7-trimethylurate	HMDB02123	0.86	0.301	0.375359
Xenobiotics	Xanthine Metabolism	1,3-dimethylurate	HMDB01857	0.63	0.1338	0.186762
Xenobiotics	Xanthine Metabolism	1,7-dimethylurate	HMDB11103	0.66	0.0584	0.088018
Xenobiotics	Xanthine Metabolism	1-methylurate	HMDB03099	0.66	0.0448	0.0695107
Xenobiotics	Xanthine Metabolism	1-methylxanthine	HMDB10738	0.56	0.0113	0.0206653
Xenobiotics	Xanthine Metabolism	3,7-dimethylurate	HMDB01982	1.11	0.6008	0.670893
Xenobiotics	Xanthine Metabolism	3-methylxanthine	HMDB01886	1.32	0.9633	0.981684
Xenobiotics	Xanthine Metabolism	5-acetylamino-6-amino-3-methyluracil	HMDB04400	0.56	0.0017	0.00376246
Xenobiotics	Xanthine Metabolism	5-acetylamino-6-formylamino-3-methyluracil	HMDB11105	0.77	0.0162	0.0285632
Xenobiotics	Xanthine Metabolism	7-methylurate		1.06	0.4471	0.526378
Xenobiotics	Xanthine Metabolism	7-methylxanthine	HMDB01991	1.19	0.7513	0.814277
Xenobiotics	Xanthine Metabolism	caffeic acid sulfate	HMDB41708	0.61	0.0205	0.0350545
Xenobiotics	Xanthine Metabolism	caffeine	HMDB01847	0.77	0.2502	0.318858
Xenobiotics	Xanthine Metabolism	paraxanthine	HMDB01860	0.68	0.0108	0.0198494
Xenobiotics	Xanthine Metabolism	theobromine	HMDB02825	1.15	0.753	0.814921
Xenobiotics	Xanthine Metabolism	theophylline	HMDB01889	0.59	0.0125	0.0226351
n = 24.
1Group mean ratio. Colored according to increase (red) or decrease (green) from PRE to POST.
2Repeated measures ANOVA, main effect of time, Q < 0.10. #Diet-by-time interaction, Q < 0.10.
3Benjamini-Hochberg correction.
*Indicates compounds that have not been officially confirmed based on a standard, but are identified with high confidence.
HMDB, Human metabolome database
